# Supplementary material for: Sequential detection of mercury(ii) and thiol-containing amino acids by a fluorescent chemosensor
Source: Royal Society of Chemistry journal article supplement (doi:10.1039/c5ra25138a), 2015-12-22
Supplement: c5ra25138a1.pdf [file c5ra25138a1.pdf]

## Supporting Information

### **Sequential detection of mercury (II) and thiol-containing amino acids by a fluorescent chemosensor**

Ga Rim You, Sun Young Lee, Jae Jun Lee, Yong Sung Kim, Cheal Kim\*

*Department of Fine Chemistry and Department of Interdisciplinary Bio IT Materials, Seoul National University of Science and Technology, Seoul 139-743, Korea. Fax: +82-2-973-9149; Tel: +82-2-970-6693; E-mail: [chealkim@seoultech.ac.kr](mailto:chealkim@seoultech.ac.kr)*

(a)

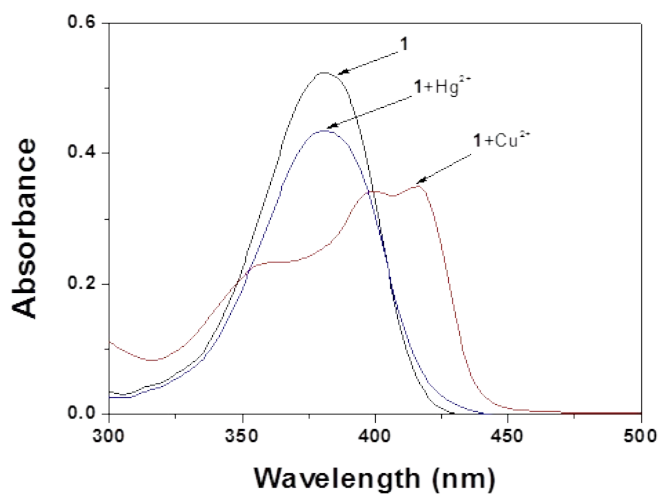

(b)

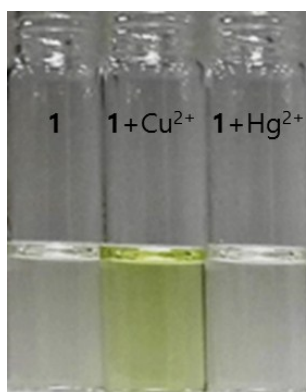

**Fig. S1** (a) Changes in the UV-vis spectra of receptor **1** (10  $\mu\text{M}$ ) upon addition of  $\text{Cu}^{2+}$  (1 equiv) and  $\text{Hg}^{2+}$  (1 equiv), respectively, in DMSO/bis-tris buffer (8/2, v/v). The bathochromic shift of **1**- $\text{Cu}^{2+}$  complex might be explained through the internal charge transfer (ICT) and ligand-to-metal charge-transfer (LMCT) in the molecule, which has the push-pull effect of the electron-donating and the electron-withdrawing group. Therefore, **1**- $\text{Cu}^{2+}$  complex showed a color change, whereas **1**- $\text{Hg}^{2+}$  complex did not. (b) The color changes of **1** (30  $\mu\text{M}$ ) upon the addition of  $\text{Cu}^{2+}$  (1 equiv) and  $\text{Hg}^{2+}$  (1 equiv), respectively, in DMSO/bis-tris buffer (8/2, v/v).

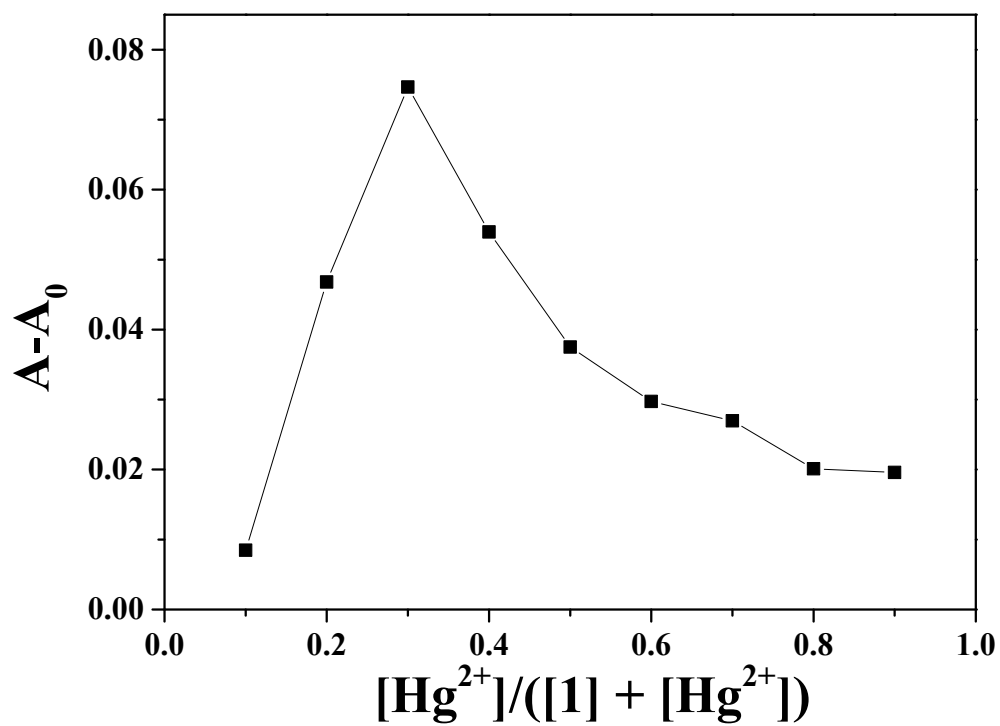

**Fig. S2** Job plot for the binding of **1** with  $\text{Hg}^{2+}$ . Absorbance at 385 nm was plotted as a function of the molar ratio  $[\text{Hg}^{2+}]/([\mathbf{1}] + [\text{Hg}^{2+}])$ . The total concentrations of mercury ions with receptor **1** were 30  $\mu\text{M}$ .

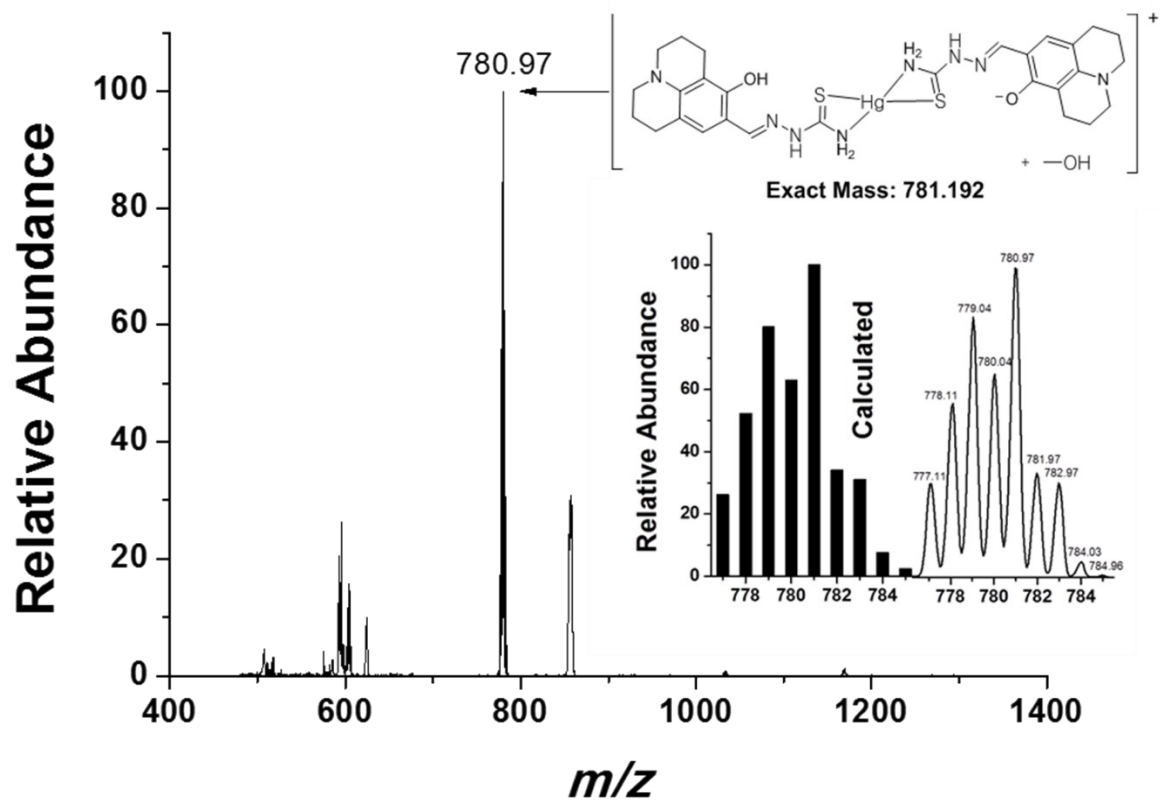

**Fig. S3** Positive-ion electrospray ionization mass spectrum of **1** (100  $\mu$ M) upon addition of 1 equiv of  $\text{Hg}(\text{NO}_3)_2$ .

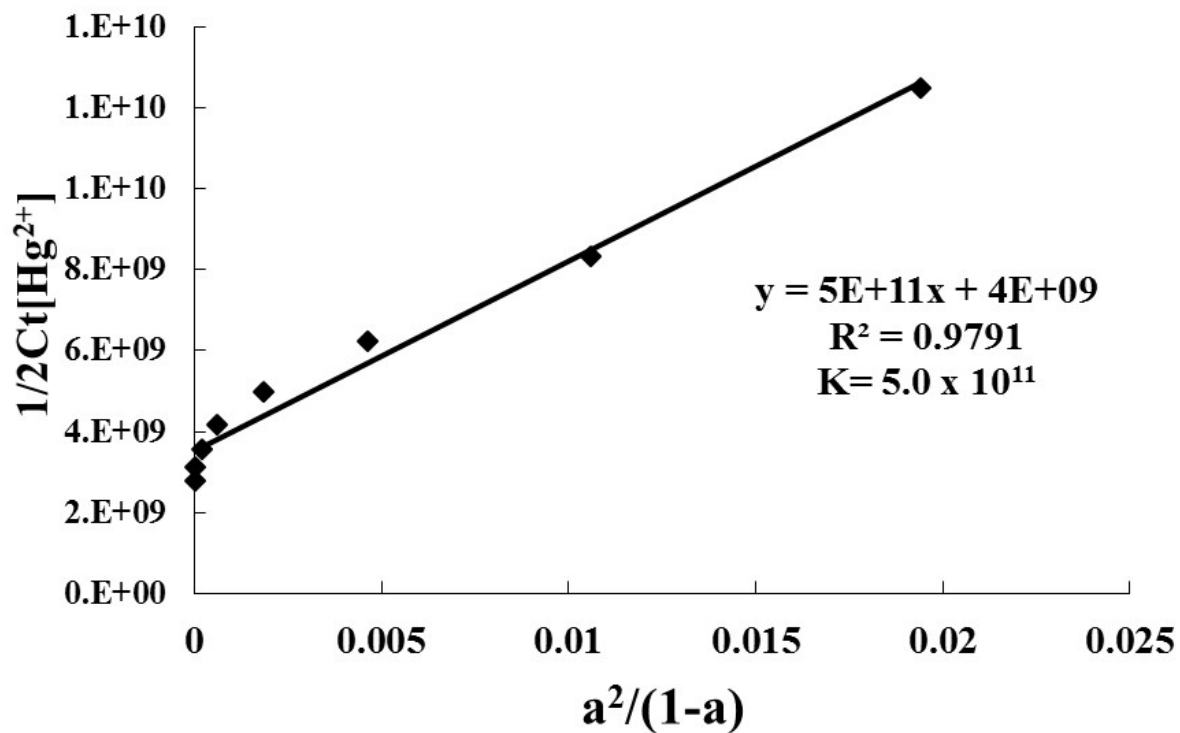

**Fig. S4** Li's equation plot (absorbance at 382 nm) of **1**, assuming 1:2 stoichiometry for association between  $Hg^{2+}$  and **1**. 'Ct' means the concentration of **1**, and 'a' does  $[(A_x - A_{max}) / (A_0 - A_{max})]$ .

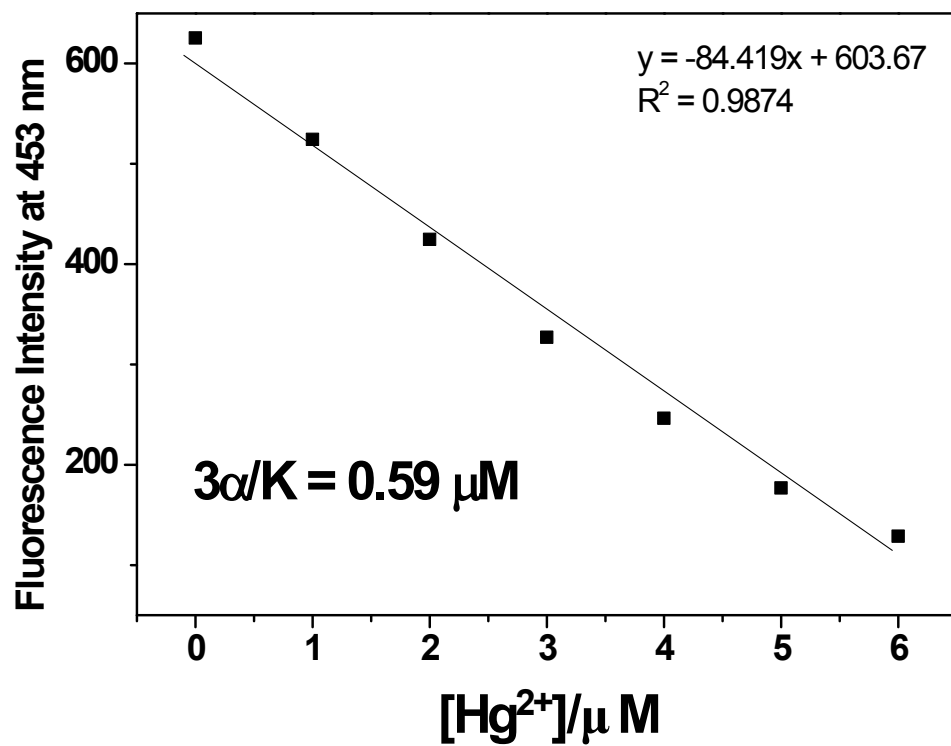

**Fig. S5** Determination of the detection limit based on change in the ratio (absorbance at 453 nm) of **1** (10  $\mu\text{M}$ ) with  $\text{Hg}^{2+}$ .

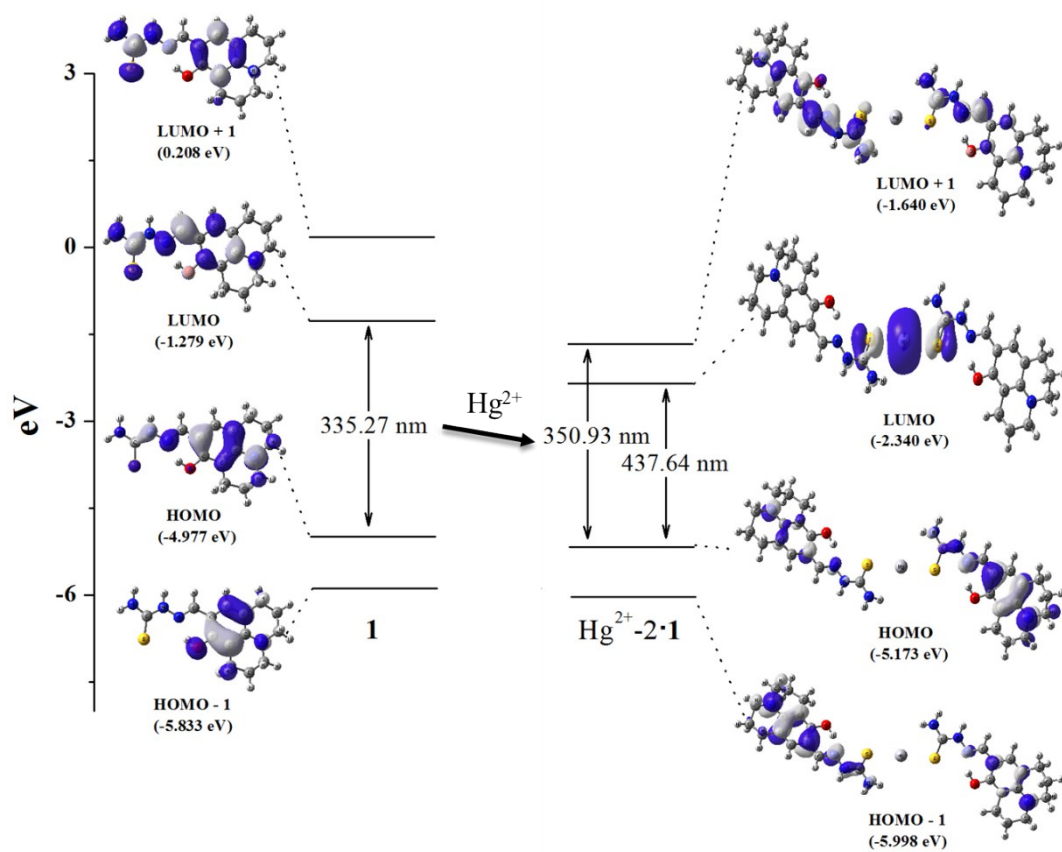

**Fig. S6** Frontier molecular orbitals and their energies of **1** and  $\text{Hg}^{2+}$ -**2·1** complex.

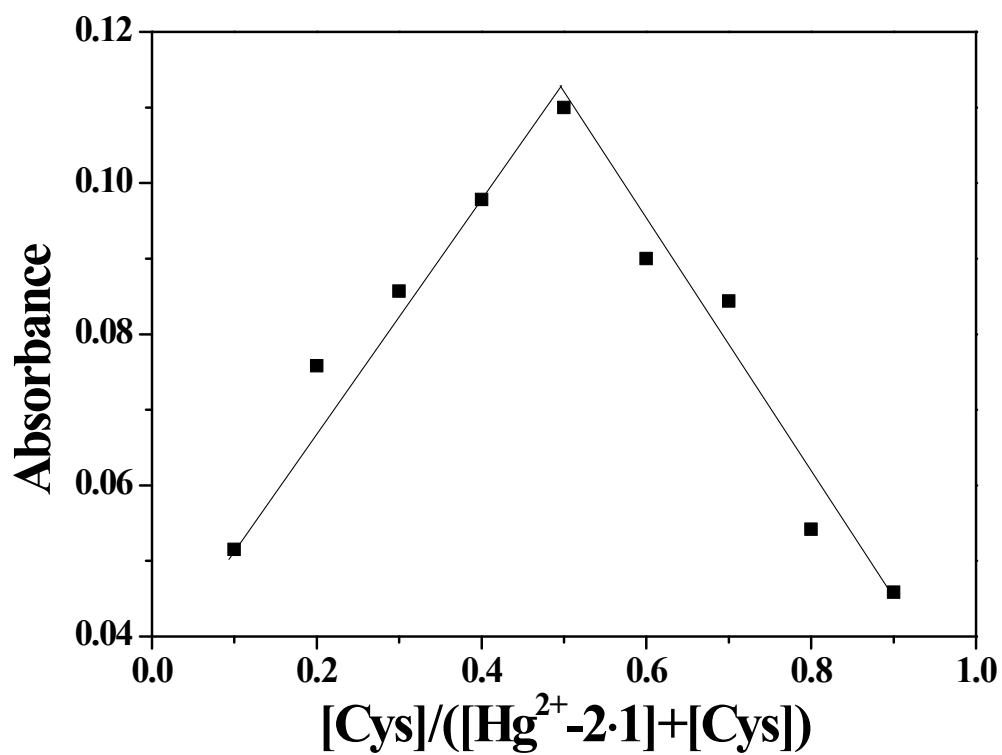

**Fig. S7** Job plot for the binding of Hg<sup>2+</sup>-2·1 with Cys. Absorbance at 382 nm was plotted as a function of the molar ratio  $[Cys]/([Hg^{2+}-2\cdot 1] + [Cys])$ . The total concentrations of Cys with Hg<sup>2+</sup>-2·1 were 10  $\mu$ M.



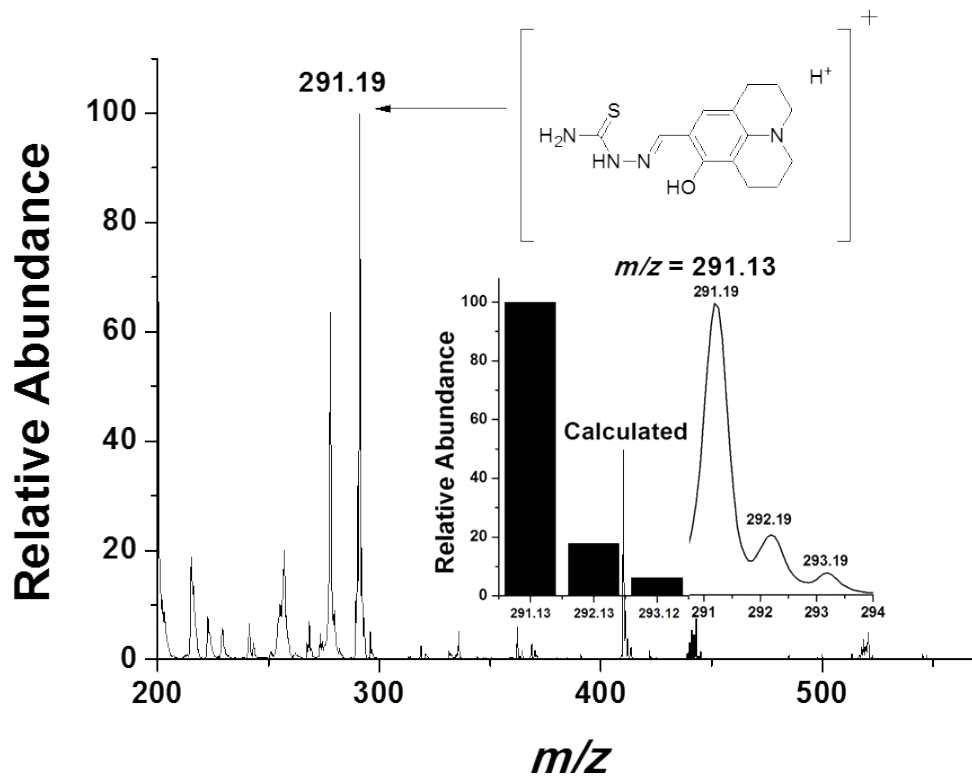

**Fig. S8** Positive-ion electrospray ionization mass spectrum of  $\text{Hg}^{2+}\text{-2}\cdot\mathbf{1}$  (100  $\mu\text{M}$ ) upon addition of 1 equiv of Cys.

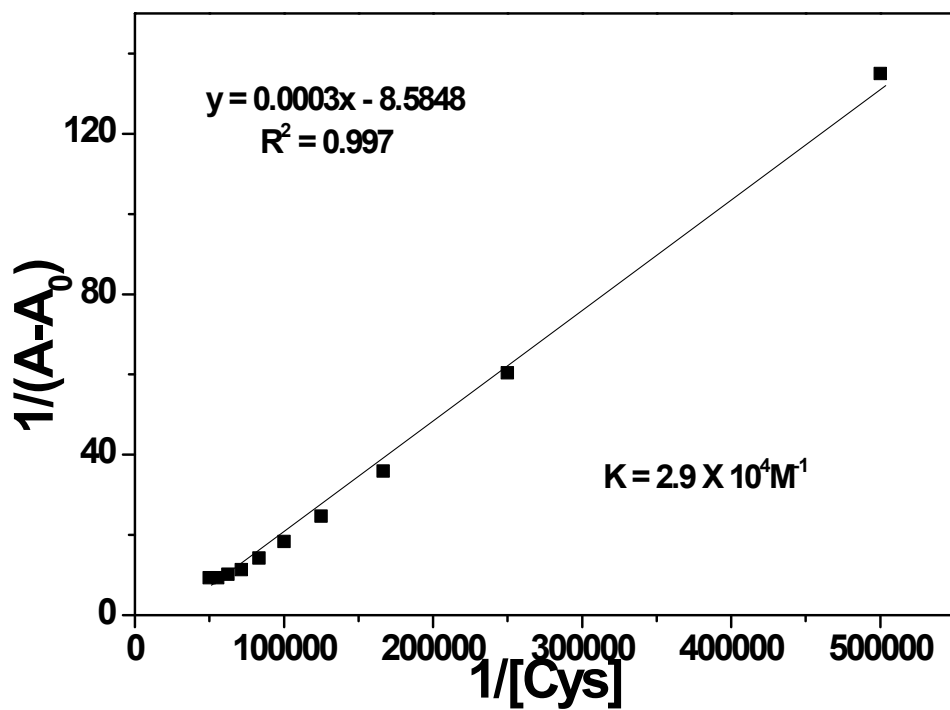

**Fig. S9** Benesi-Hildebrand plot (absorbance at 382 nm) of **1**, assuming a 1:1 stoichiometry for association between **1** and  $Hg^{2+}$ .

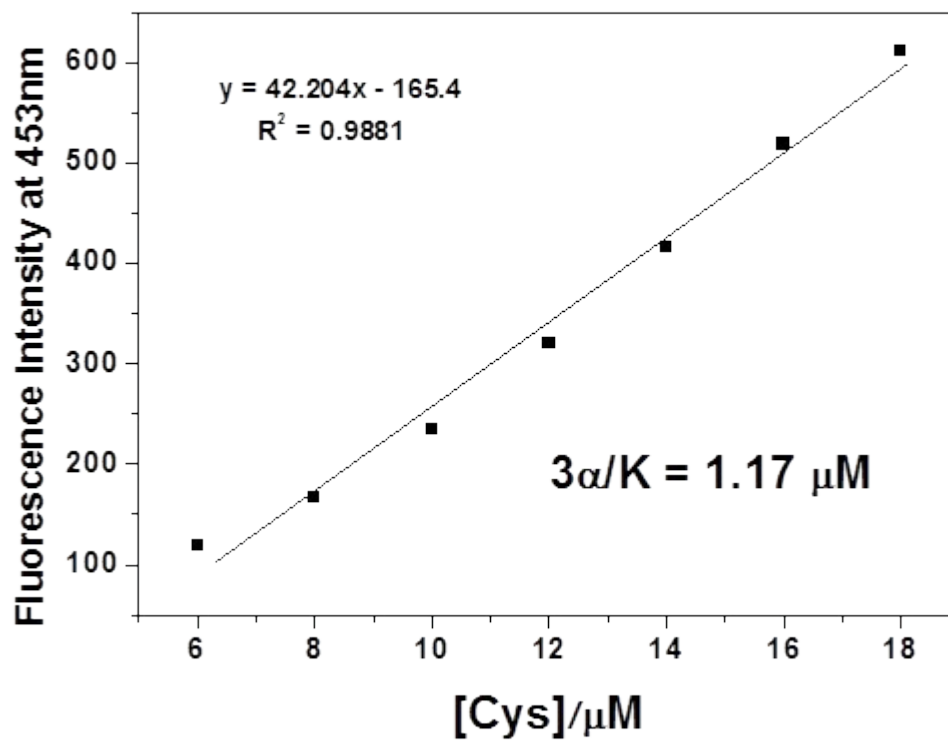

**Fig. S10** Determination of the detection limit based on change in the ratio (absorbance at 453 nm) of  $\text{Hg}^{2+}$ -2·1 (10 μM) with Cys.

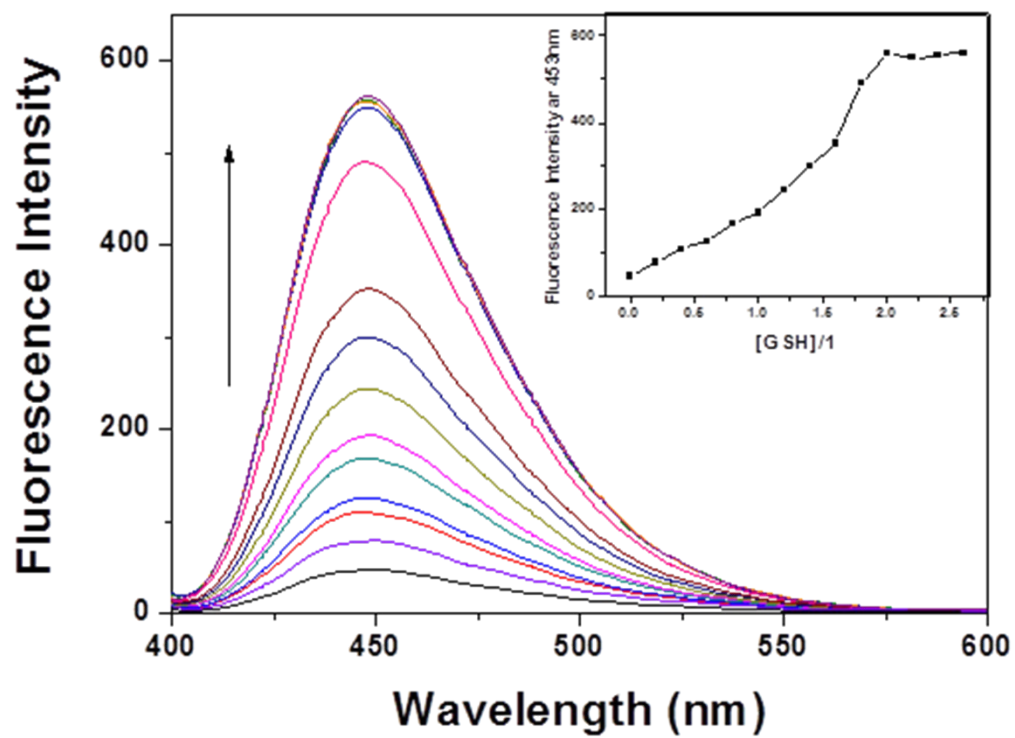

**Fig. S11** Fluorescence spectral changes of Hg<sup>2+</sup>-2·1 in the presence of different concentrations of GSH in DMSO/bis-tris buffer (8/2, v/v). Inset: Fluorescence intensity at 453 nm versus the number of equiv of GSH added.

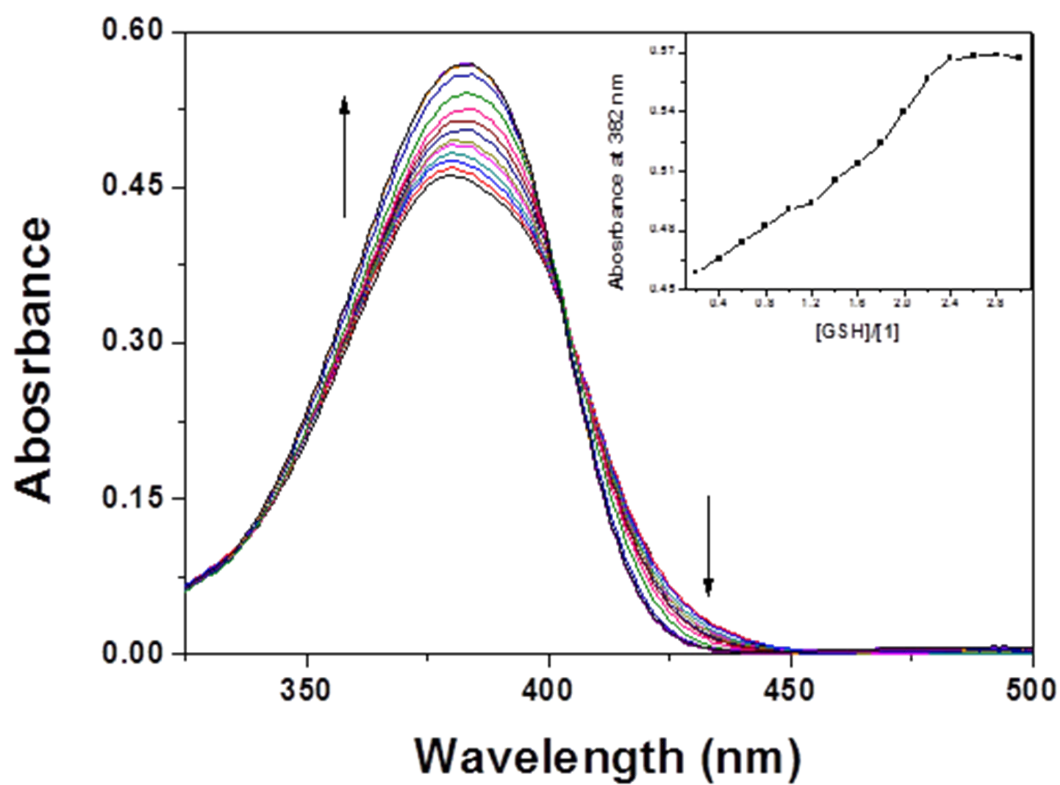

**Fig. S12** Absorption spectral changes of  $\text{Hg}^{2+}\text{-}2\cdot\mathbf{1}$  after addition of increasing amounts of GSH in DMSO/bis-tris buffer (8/2, v/v). Inset: Absorption at 382 nm versus the number of equiv of GSH added.

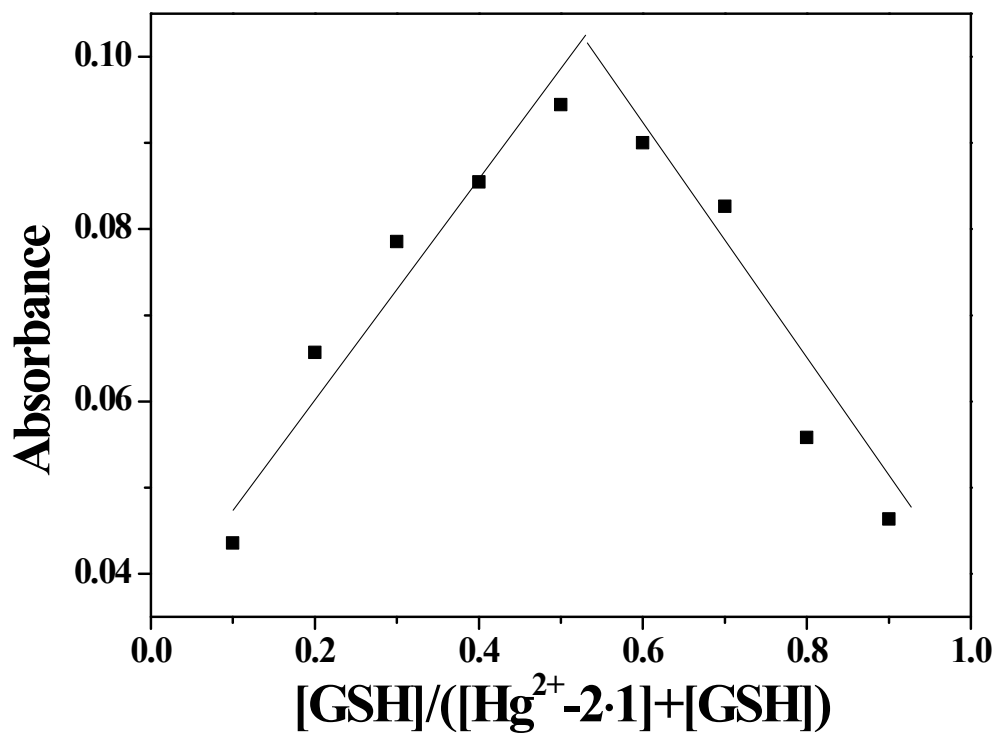

**Fig. S13** Job plot for the binding of  $\text{Hg}^{2+}\text{-}2\cdot\mathbf{1}$  with Cys. Absorbance at 382 nm was plotted as a function of the molar ratio  $[\text{GSH}]/([\text{Hg}^{2+}\text{-}2\cdot\mathbf{1}] + [\text{GSH}])$ . The total concentrations of Cys with  $\text{Hg}^{2+}\text{-}2\cdot\mathbf{1}$  were 10  $\mu\text{M}$ .

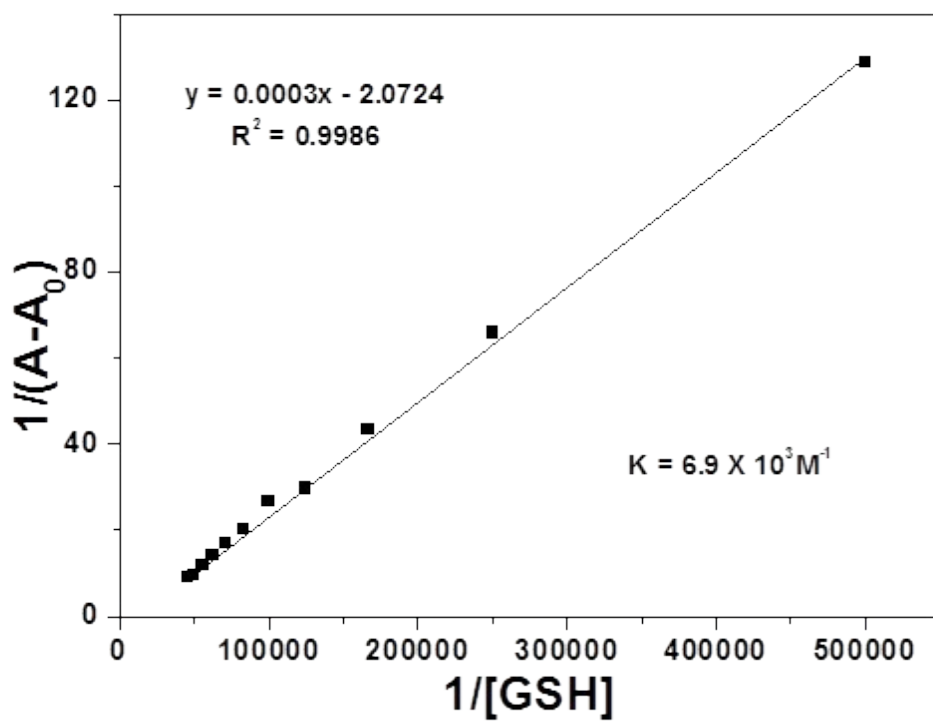

**Fig. S14** Benesi-Hildebrand plot (absorbance at 382 nm) of **1**, assuming a 1:1 stoichiometry for association between  $\text{Hg}^{2+} \cdot 2 \cdot \mathbf{1}$  and GSH.

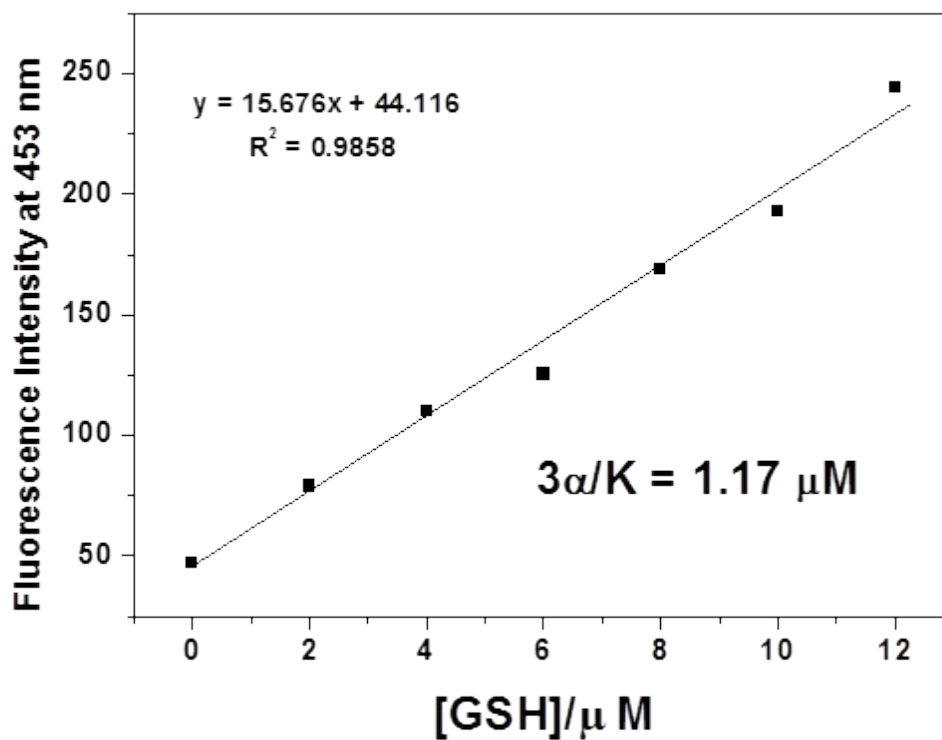

**Fig. S15** Determination of the detection limit based on change in the ratio (absorbance at 453 nm) of  $\text{Hg}^{2+}$ -2·1 (10 μM) with GSH.



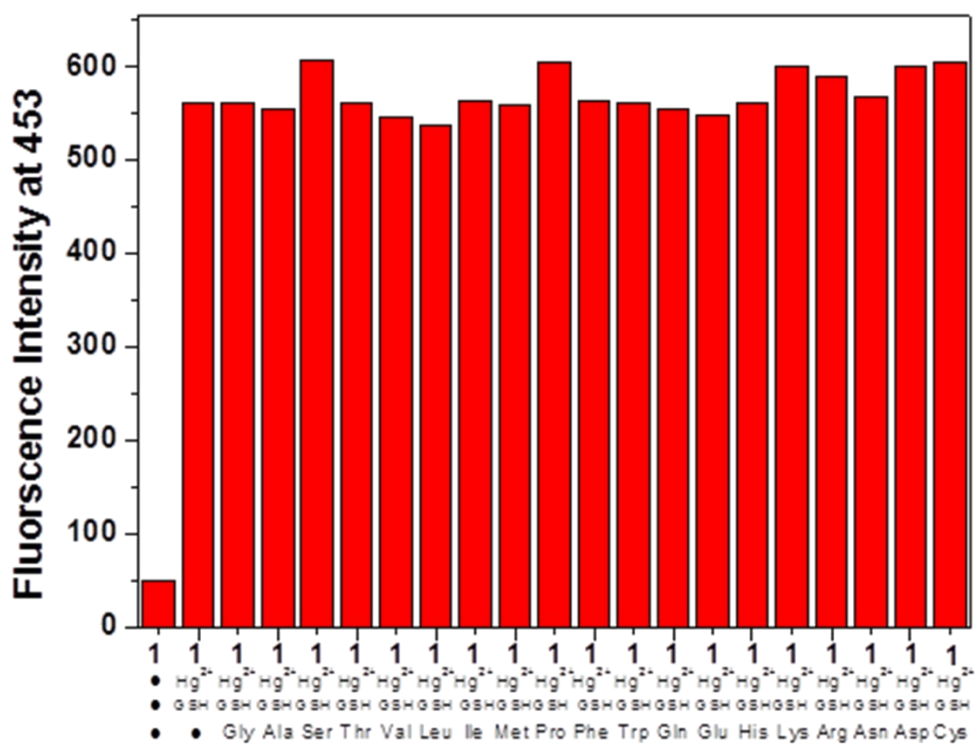

**Fig. S16** Competitive selectivity of Hg<sup>2+</sup>-2·1 toward GSH (2 equiv) in the presence of other amino acids (2 equiv) in DMSO/bis-tris buffer (8/2, v/v).

(a)

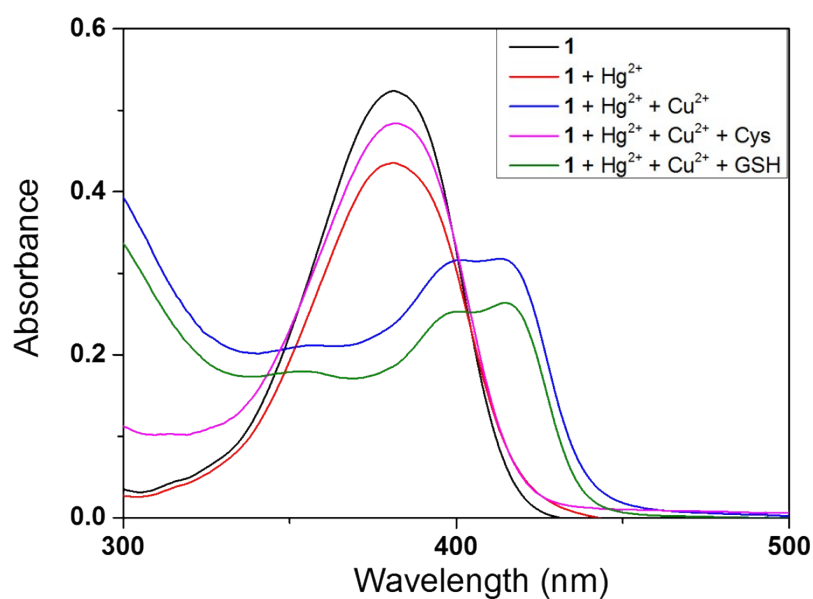

(b)

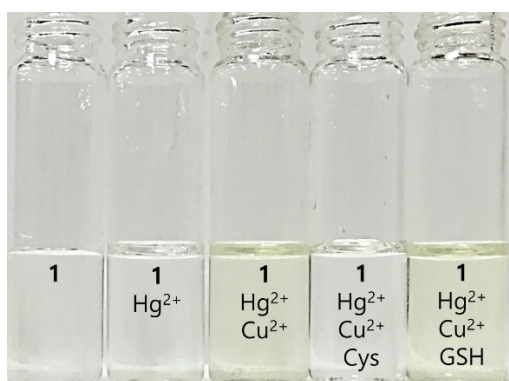

**Fig. S17** (a) Changes in the UV-vis spectra of **1** (10  $\mu$ M), **1**-Hg<sup>2+</sup> (1 equiv), **1**-Hg<sup>2+</sup>-Cu<sup>2+</sup> (1 equiv), **1**-Hg<sup>2+</sup>-Cu<sup>2+</sup> (1 equiv)-Cys (13 equiv), and **1**-Hg<sup>2+</sup>-Cu<sup>2+</sup> (1 equiv)-GSH (13 equiv), respectively. (b) Color changes of **1** (10  $\mu$ M), **1**-Hg<sup>2+</sup> (1 equiv), **1**-Hg<sup>2+</sup>-Cu<sup>2+</sup> (1 equiv), **1**-Hg<sup>2+</sup>-

$\text{Cu}^{2+}$  (1 equiv)-Cys (13 equiv), and  $1\text{-Hg}^{2+}\text{-Cu}^{2+}$  (1 equiv)-GSH (13 equiv), respectively.

(a)

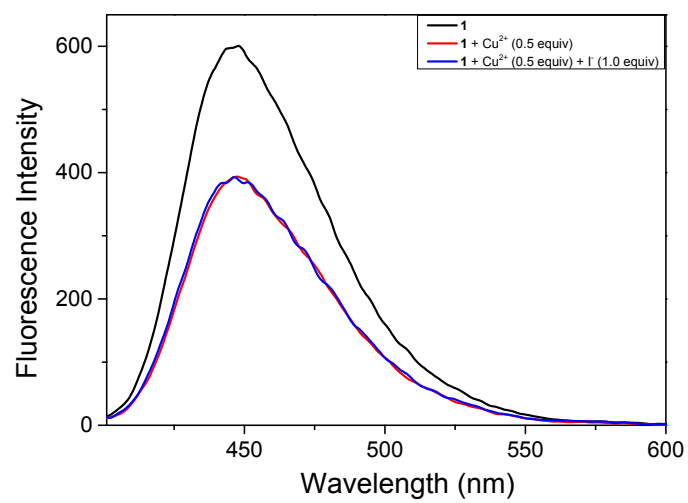

(b)

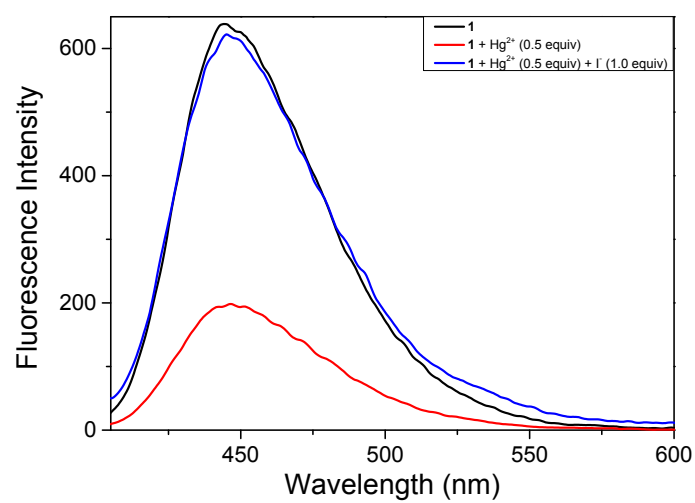

**Fig. S18** Recovery tests of **1** with (a) **1**-Cu<sup>2+</sup> (0.5 equiv) complex and (b) **1**-Hg<sup>2+</sup> (0.5 equiv) complex in presence of I<sup>-</sup> in DMSO/bis-tris buffer (8/2, v/v).
